# Supplementary material for: Mafic-ultramafic igneous rocks as a source of reactive phosphorus for the origin of life
Source: Research Square preprint supplement (doi:10.21203/rs.3.rs-7915382/v1), 2026-01-08
Supplement: Supplementary file 1 [file 3a1e69b509213b8b0e7b7980.docx]

Mafic-ultramafic igneous rocks as a source of reactive phosphorus for the origin of life

Abu Saeed Baidya1, Craig R. Walton2,3, Joanna Kalita1, Kristoffer Szilas4, Marco Viccaro5, Paul Savage1, Stuart Allison1, Euan Nisbet6, Sami Mikhail1, Eva E. Stüeken1

*1School of Earth and Environmental Sciences, University of St. Andrews, St Andrews KY16 9TS, United Kingdom*

*2Department of Earth and Planetary Sciences, ETH Zurich, Sonneggstrasse 5, 8092 Zurich, Switzerland*

*3Trinity College, University of Cambridge, Cambridge CB2 1TQ, United Kingdom*

*4Department of Geosciences and Natural Resource Management, University of Copenhagen, Copenhagen, Denmark*

*5Department of Biological, Geological and Environmental Sciences, University of Catania, Italy*

*6Department of Earth Sciences, Royal Holloway, University of London, Egham TW20 0EX, UK*

*Corresponding Author: Abu Saeed Baidya (*[*asb27@st-andrews.ac.uk*](mailto:asb27@st-andrews.ac.uk)*)*

**This File contains:**

Supplementary Notes

Supplementary Figures with captions

Supplementary Table 1

Supplementary Notes

Basalt samples (n=6) were collected from the Canary Islands, Spain (n=1), Kilbourne Hole, USA (n=2), and Mount Etna, Italy (n=1). In addition, previously published data from basalts from the Moodies Group, South Africa (n=2), were incorporated1 (Supplementary Table 1). Overall, major- and trace-element compositions overlap with those of ocean-island basalts (OIB) and mid-ocean-ridge basalts (MORB) in MgO–Ni, MgO–CaO and MgO–P₂O₅ space (Fig. S1a–c). Consistent with this, previous studies report that basalts from the Canary Islands and Kilbourne Hole are OIB-like2,3. A positive U–K₂O correlation indicates minimal alteration (Fig. S1d). We therefore consider these basalts as representative of early-Earth ocean-floor lavas and use them in models estimating phosphite concentrations in ocean and prebiotic-lake settings.

Olivine samples (n = 4) comprise one from a pallasite meteorite, one fayalite from the Lasigkulla mine (Sweden), one from lherzolite, and one from Hawaiian basalt. Among them, the last two are considered as ‘olivine separates’. The fayalite sample may contain minor accessory phases. Regarding peridotite samples (n= 15), one is harrisite from the Isle of Rum (Scotland), one is harzburgite, and the rest are dunite (Supplementary Table 1). The harrisite specimen shows intergrowths of olivine and plagioclase. These rocks show no petrographic or geochemical evidence of alteration, and their CaO and Al₂O₃ contents are consistent with magmatic differentiation (Supplementary Fig. S3).

Komatiite samples were collected from the Belingwe greenstone belt, Zimbabwe, and show no or minor alteration4.

| 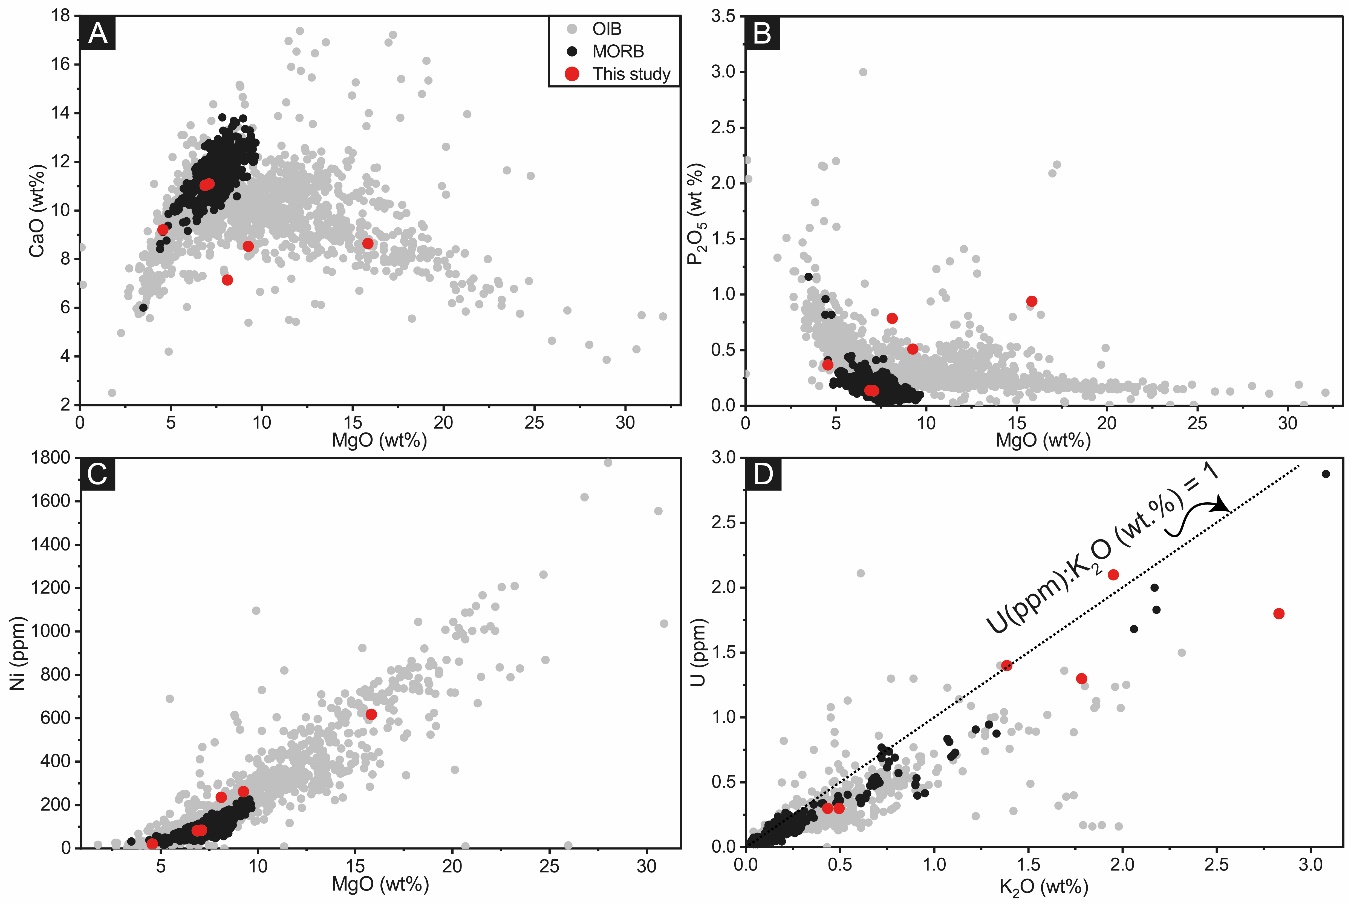  Fig. S1: Comparison of the studied basalts with ocean-island basalts (OIB) and mid-ocean-ridge basalts (MORB). MORB and OIB data are from Stracke et al.5 (A) MgO versus CaO; (B) MgO versus P₂O₅; and (C) MgO versus Ni. In A–C, samples span both OIB and MORB compositional fields. (D) K₂O and U are positively correlated, indicating minimal alteration. |
| --- |

| 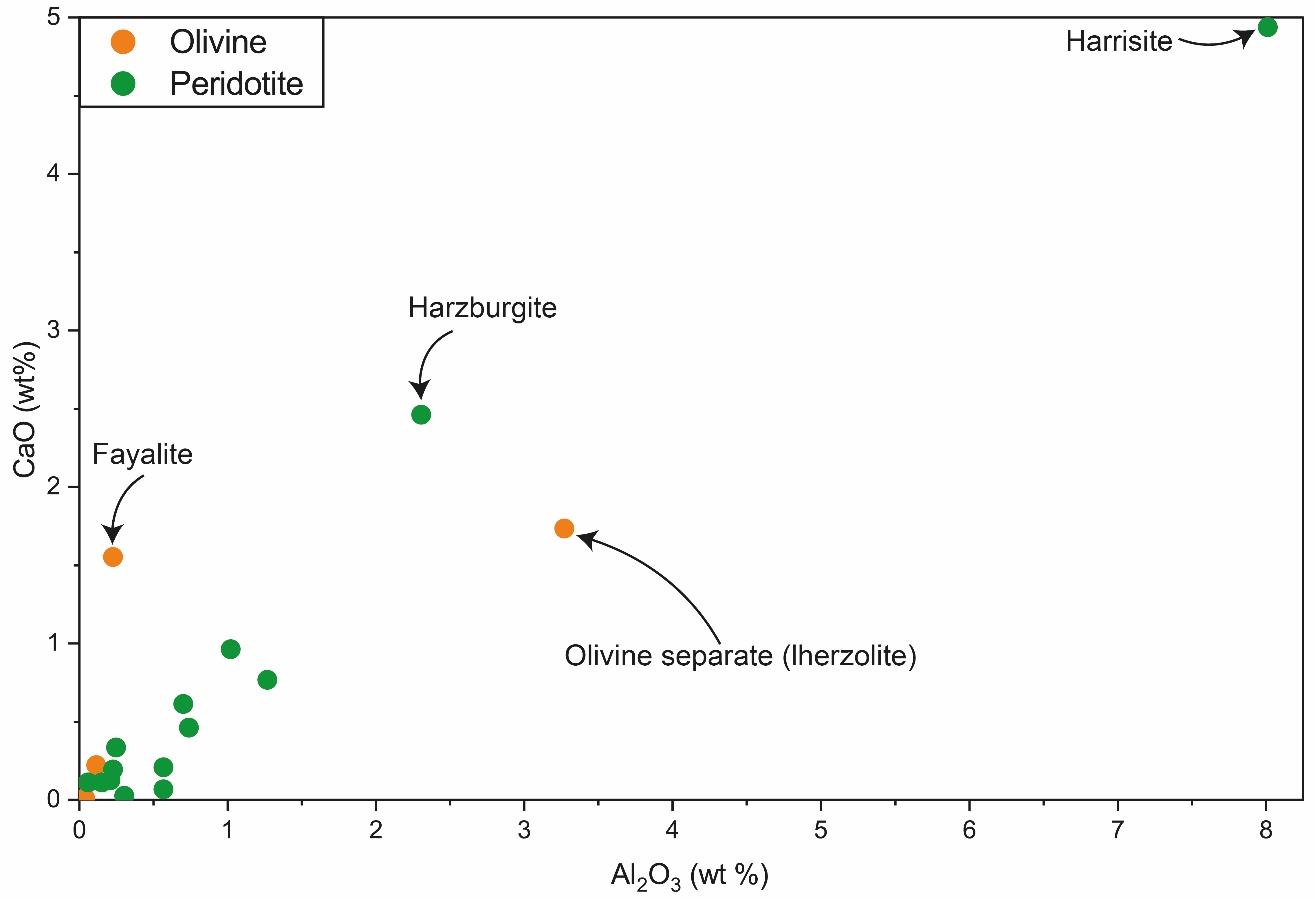  Fig. S2: Olivine and peridotite samples show a positive correlation between calcium oxide (CaO) and aluminium oxide (Al₂O₃); this trend suggests magmatic differentiation. Harrisite is an intergrowth of olivine and plagioclase while fayalite sample contain some unidentified phases, which may explain relatively higher Al and/or Ca contents in these samples. The olivine separates from lherzolite may contain some pyroxene grains or inclusion, which explains relatively higher Al and Ca contents. |
| --- |

| 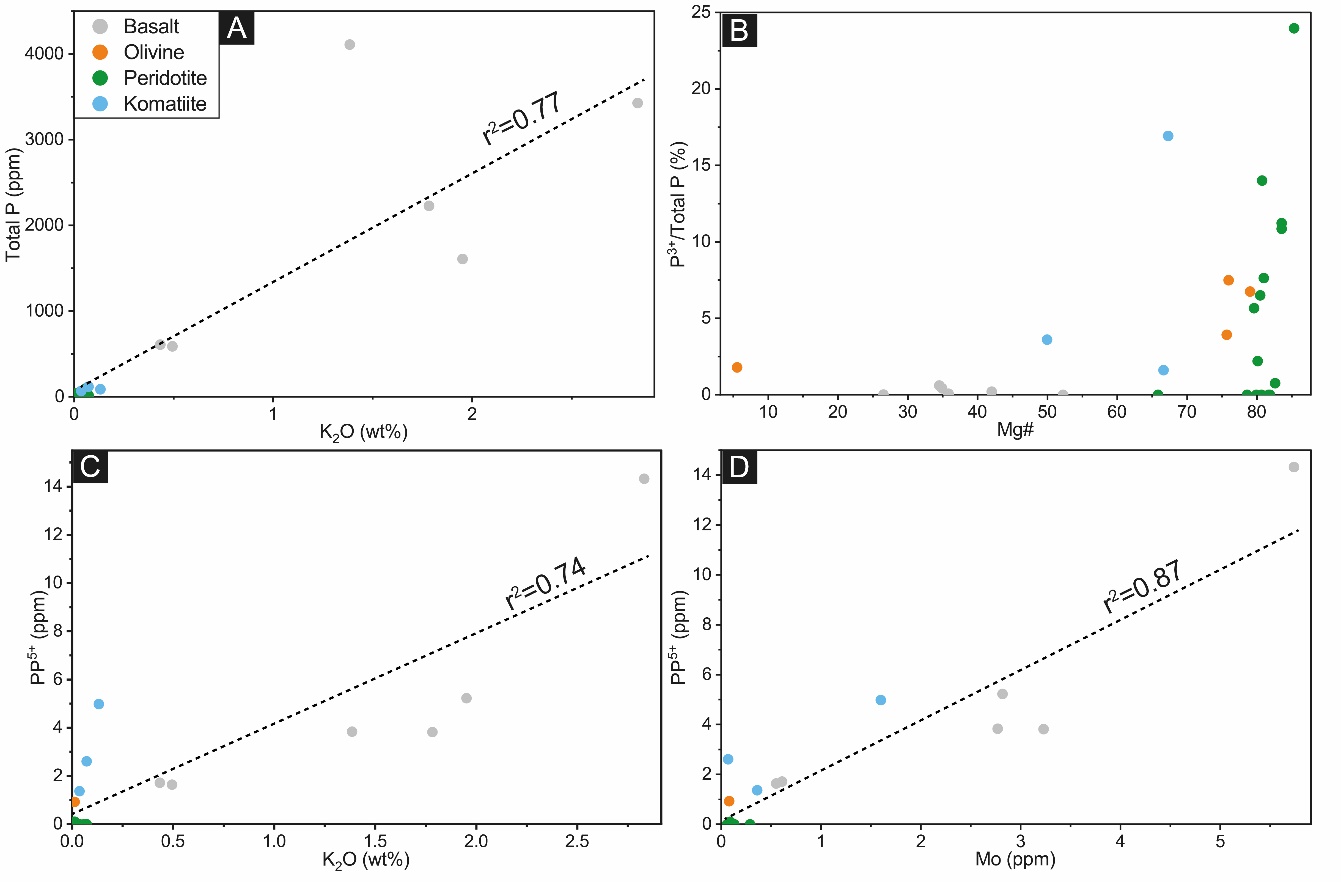  Fig. S3: Phosphorus chemistry and its correlations with major and trace elements in the studied samples. (A) Phosphorus (P) versus potassium oxide (K₂O) shows a positive correlation consistent with co-enrichment during magmatic differentiation. (B) Samples with higher magnesium number (Mg#) exhibit greater phosphite [P(III)] to total phosphorus (ΣP) percentages. (C–D) Pyrophosphate (PP(V)) correlates positively with potassium oxide (K₂O) and with molybdenum (Mo), respectively. |
| --- |

Supplementary Table 1- List and description of the samples

| **Samples** | **Rock/mineral type** | **Location and description** |
| --- | --- | --- |
| E03-Ba | Basalt | Xenolith host, Kilbourne Hole |
| A02-Ba | Basalt | Xenolith Host, Kilbourne Hole |
| A07-Ba | Basalt | Xenolith Host, Canary Island |
| A11-Ba | Basalt | Volcanics, Mount Etna |
| B22-Ba | Basalt | Moodies Group Intrusive |
| B23-Ba | Basalt | Moodies Group Intrusive |
|  |  |  |
| B4 | Komatiite | Belingwe greenstone belt, Zimbabwe |
| ZV 10 | Komatiite | Belingwe greenstone belt, Zimbabwe |
| ZV 14 | Komatiite | Belingwe greenstone belt, Zimbabwe |
| ZV 15 | Komatiite | Belingwe greenstone belt, Zimbabwe |
| ZV 79 | Komatiite | Belingwe greenstone belt, Zimbabwe |
|  |  |  |
| A08-Ol | Peridotite | olivine-plagioclase intergrowth, Rhum Island |
| A07-Ol | Peridotite | Dunite peridotite, Canary Island |
| E03-Ol | Peridotite | Dunite peridotite, Kilbourne Hole |
| A02-Ol | Peridotite | Dunite peridotite, Kilbourne Hole |
| A10-Ol | Peridotite | Dunite peridotite, Ubekendt Island |
| E01-Ol | Peridotite | Dunite peridotite, San Carlos, Arizona (?) |
| A09-Ol | Peridotite | Peridotite, Unknown origin |
| A01-Ol | Peridotite | Dunite peridotite, San Carlos, Arizona |
| A05-Ol | Peridotite | Dunite peridotite, Jiaohe peridotite, Jihin Province |
| A06-Ol | Peridotite | Dunite peridotite, Kohistan Arc Pakistan |
| E02-Peri | Peridotite | Dunite, Gustal olivine pit, Norway |
| A12A-Peri | Peridotite | Dunite, Seqi Mine, Norway |
| A12B-Peri | Peridotite | Dunite, Seqi Mine, Norway |
| A12C-Peri | Peridotite | Dunite, Seqi Mine, Norway |
| A14-Peri | Peridotite | Harzburgite, Balmuccia, Italy |
|  |  |  |
| A03-Ol | Olivine separates | Basalt-hosted olivine, Hawaii |
| A13-Ol | Olivine separates | Lherzolite-hosted, Kilbourne Hole |
|  |  |  |
| A16-Ol | Fayalite | Lastigkulla, Sweden |
| A04-Ol | Olivine separates | Admire pallasite meteorite, Arizona |

# References

1. Baidya, A. S., Gehringer, M. M., Savaniu, C., Heubeck, C. & Stüeken, E. E. Magmatic and thermally produced reactive phosphorus 3.2 billion years ago and its implications for early life. *Commun. Earth Environ.* **Accepted**, (2025).

2. Thomas, L. E., Hawkesworth, C. J., Van Calsteren, P., Turner, S. P. & Rogers, N. W. Melt generation beneath ocean islands: a U-Th-Ra isotope study from Lanzarote in the Canary Islands. *Geochim. Cosmochim. Acta* **63**, 4081–4099 (1999).

3. Thompson, R. N. *et al.* Source of the Quaternary Alkalic Basalts, Picrites and Basanites of the Potrillo Volcanic Field, New Mexico, USA: Lithosphere or Convecting Mantle? *J. Petrol.* **46**, 1603–1643 (2005).

4. Nisbet, E. G. *et al.* Uniquely fresh 2.7 Ga komatiites from the Belingwe greenstone belt, Zimbabwe. *Geology* **15**, 1147–1150 (1987).

5. Stracke, A., Willig, M., Genske, F., Béguelin, P. & Todd, E. Major and trace element concentrations and Sr, Nd, Hf, Pb isotope ratios of global mid ocean ridge and ocean island basalts. *GFZ Data Services* (2022) doi:https://doi.org/10.5880/digis.e.2024.008.
